# Supplementary material
Source: Springer Nature journal article supplement (https://www.springermedizin.de/resource/supplementary/12885_2010_2874_MOESM7_ESM.pdf/9462200)
Supplement: MOESM7 [file 9462200]

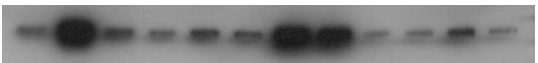

p-EGFR

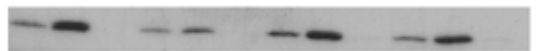

p-Akt

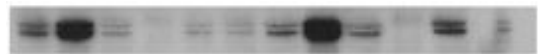

p-MAPK

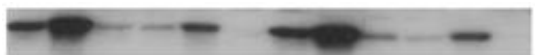

p-MEK1/2

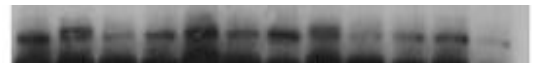

p-Raf

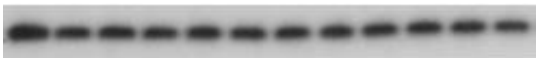

Tubulin

AG + 8Gy  
Rapa + 8Gy  
PD + 8Gy  
LY + 8Gy  
EGF + 8Gy  
control + 8Gy  
AG  
Rapa  
PD  
LY  
EGF  
control
